# Supplementary material for: Raman-guided subcellular pharmaco-metabolomics for metastatic melanoma cells
Source: Nat Commun. 2020 Sep 24;11:4830. doi: 10.1038/s41467-020-18376-x (PMC7518429; doi:10.1038/s41467-020-18376-x)
Supplement: Supplementary file 5 — Supplementary Data 1 [file 41467_2020_18376_MOESM5_ESM.xlsx]

## Sheet: Key-to-Lipidomics-Data
	Lipids data is provided in six different worksheets. The details of the data in each sheet is as follows:
	Sheet 1 Lipid Species Concentrations
		This sheet provides comprehensive list of various lipids from 13 different lipid classes and their absolute concentrations. The concentrations are expressed in nmol/g of plasma (µM)*
		Note: Each of your samples was added with a set of representative isotope labeled lipids for each class to obtain the absolute concentrations.
													*for tissue samples, multiply by 25 and divide by mg of sample
		The names of the 13 Lipid classes are:				Abbreviation	Lipid class
					1	CE	Cholesterol Ester
					2	CER	Ceramides
					3	DAG	Diacylglycerol
					4	DCER	Dihydroceramides
					5	FFA	Free fatty Acids
					6	HCER	Hexosylceramides
					7	LCER	Lactosylceramide
					8	LPC	Lysophosphatidylcholine
					9	LPE	Lysophosphatidylethanolamine
					10	PC	Phosphatidylcholine
					11	PE	Phosphatidylethanolamine
					12	SM	Sphingomyelin
					13	TAG	Triacylglycerol
	Sheet 2 Lipid Species Composition
		In this sheet, each lipid in sheet 1 is expressed in % composition and is calculated as follows:
			Composition (%)	=	(lipid concentration /sum of all lipids concentration from that class)*100
	Sheet 3 Lipid Class Concentration
		This sheet provides total concentration for each of the 13 lipid classes. These are obtained by summing up individual lipid concentrations for the respective class in sheet 1.
	Sheet 4 Lipid Class Composition
		This sheet shows % composition for each of the 13 lipid classes.
		Note: Sum of % composition of all 13 lipid classes is 100.
	Sheet 5 Fatty Acid Concentration
		This sheet sums the concentrations for all fatty acids that are the same in one lipid class.
		For example: PC(FA18:1) is the sum of the concentrations of PC(12:0/18:1), PC(14:0/18:1), PC(15:0/18:1), etc for all PC(x/18:1)
	Sheet 6 Fatty Acid Composition
		In this sheet, each fatty acid in sheet 5 is expressed in % composition and is calculated as follows
			Composition (%)	=	(fatty acid concentration /sum of all fatty acids concentration from that class)*100

## Sheet: Sample ID
		2019-08-26
Heath, James ISB (Su, Yapeng) Cells N = 15
Study Sample ID	Protein (ug)		Lipodomics samples correspondence
2-3	601.457		1	CT	3 replicates
1-1	504.954		2	CAY	3 replicates
2-1	649.01
2-2	688.171
1-2	527.331
1-3	485.373

## Sheet: Lipid Species Concentrations
Order	Study ID	CE(12:0)	CE(14:0)	CE(14:1)	CE(15:0)	CE(16:0)	CE(16:1)	CE(17:0)	CE(18:0)	CE(18:1)	CE(18:2)	CE(18:3)	CE(20:0)	CE(20:1)	CE(20:2)	CE(20:3)	CE(20:4)	CE(20:5)	CE(22:0)	CE(22:1)	CE(22:2)	CE(22:4)	CE(22:5)	CE(22:6)	CE(24:0)	CE(24:1)	CER(14:0)	CER(16:0)	CER(18:0)	CER(18:1)	CER(20:0)	CER(22:0)	CER(22:1)	CER(24:0)	CER(24:1)	CER(26:0)	CER(26:1)	DAG(12:0/16:0)	DAG(12:0/18:1)	DAG(14:0/14:0)	DAG(14:0/16:0)	DAG(14:0/16:1)	DAG(14:0/18:1)	DAG(14:0/18:2)	DAG(14:0/20:0)	DAG(14:0/20:4)	DAG(14:0/22:6)	DAG(14:1/16:0)	DAG(14:1/18:1)
YS-00	Blank	0	0	0	0	0	0	0	0	0	0	0	0	0	0	0	0	0	0	0	0	0	0	0	0	0	169	0	0	0	0	0	0	0	0	0	0	0	0	0	0	0	0	0	0	0	0	0	0
QC-1		0	500184	2661	9146	1302866	406928	101885	1403172	360096	204588	0	101467	509536	108718	104581	103523	1977	5014	200506	105258	8897	100311	100135	104345	209787	6451	1102448	105101	10653	1484	104771	1429	704018	50703	1466	1521	0	0	6554	602039	8903	205452	0	3636	0	1233	2652	6097
QC-2		0	406523	0	7776	1304109	407356	102144	1408349	3409893	205218	2589	101314	60246	108681	103983	102001	1858	7295	202884	106795	9138	8745	9066	107779	300692	5957	1004349	10448	105368	1614	10306	1695	608802	505145	1184	1784	0	0	678	506772	5979	203102	2951	3464	1151	1731	2058	6147
QC-3		0	500991	0	8953	1401902	409556	102153	1500206	3308344	203994	2833	100034	600612	200055	103814	102085	2159	6098	201314	106115	8673	8582	100738	1057	209049	6395	1008445	105241	106267	1622	105224	1628	702627	50749	1686	1815	0	0	5736	505586	8055	20356	0	0	0	1204	2141	5828
YS-05	1-1	0	402242	2359	5892	1009965	503789	9953	800901	6004027	403461	3561	9555	807556	40186	308305	204174	3639	3742	306731	202359	205071	200681	107363	105129	603362	4402	703183	5718	102374	0	3419	0	201661	309708	0	1226	0	0	4581	404831	475	108575	0	0	0	0	0	5275
YS-13	1-2	0	404671	2949	5823	1304387	601303	101271	805622	7007453	407921	301	100482	908539	501417	402267	206625	392	5673	402421	203938	208708	204319	200699	109574	70416	618	805607	718	10077	0	3984	1104	202918	407492	0	1574	0	0	5899	508145	8063	207111	0	0	0	0	1411	6032
YS-15	1-3	0	401189	2551	6503	100288	50712	100729	707968	5808603	402926	2843	8818	801668	405616	30473	201653	3744	496	303692	201055	205264	201429	107634	104991	607548	4067	70065	6741	101526	0	2871	933	108043	30883	0	1585	0	0	4303	405072	7114	20549	2513	0	0	0	0	5572
YS-06	2-1	2858	1308529	6416	204193	3801105	120494	303959	4602406	6709751	502724	4009	301869	1208252	204949	105227	200045	2889	103704	303208	7966	7902	101503	105846	402399	309609	7424	1108779	104275	5884	1767	109961	0	709903	202488	0	0	5013	0	7429	605123	104357	301726	0	6316	0	1704	2636	4563
YS-11	2-2	0	904593	4186	104156	2603164	805989	204333	3207814	490181	306215	2883	207138	903199	106686	101379	103272	2059	102069	302999	309507	5748	9389	100671	30314	300382	4189	70709	10286	305197	0	102019	0	408177	103701	0	0	0	0	6239	404956	10224	209	333	8691	0	1975	5095	10348
YS-04	2-3	0	1609114	771	205527	440787	1400298	308765	5602943	7307851	601802	4303	30571	1401241	300089	106673	202466	3901	200231	309758	200158	9057	103504	108447	407862	500101	7506	1201505	107267	201647	2126	109095	1343	802633	203965	1536	0	0	3046	0	0	105512	303465	3469	0	0	2061	3681	8225
[truncated: 845 more columns]

## Sheet: Lipid Species Composition
Order	Study ID	CE(12:0)	CE(14:0)	CE(14:1)	CE(15:0)	CE(16:0)	CE(16:1)	CE(17:0)	CE(18:0)	CE(18:1)	CE(18:2)	CE(18:3)	CE(20:0)	CE(20:1)	CE(20:2)	CE(20:3)	CE(20:4)	CE(20:5)	CE(22:0)	CE(22:1)	CE(22:2)	CE(22:4)	CE(22:5)	CE(22:6)	CE(24:0)	CE(24:1)	CER(14:0)	CER(16:0)	CER(18:0)	CER(18:1)	CER(20:0)	CER(22:0)	CER(22:1)	CER(24:0)	CER(24:1)	CER(26:0)	CER(26:1)	DAG(12:0/16:0)	DAG(12:0/18:1)	DAG(14:0/14:0)	DAG(14:0/16:0)	DAG(14:0/16:1)	DAG(14:0/18:1)	DAG(14:0/18:2)	DAG(14:0/20:0)	DAG(14:0/20:4)	DAG(14:0/22:6)	DAG(14:1/16:0)	DAG(14:1/18:1)
YS-00	Blank	.	.	.	.	.	.	.	.	.	.	.	.	.	.	.	.	.	.	.	.	.	.	.	.	.	100	.	.	.	.	.	.	.	.	.	.	.	.	.	.	.	.	.	.	.	.	.	.
QC-1		.	4.9373	0.2618	0.8998	13.0716	4.6169	1.1692	14.0856	35.5121	2.4191	.	1.1281	5.8573	1.8415	1.4345	1.3304	0.1945	0.4933	2.0174	1.5011	0.8753	1.0144	0.9971	1.4113	2.9305	2.1342	37.2037	4.9961	5.469	0.4911	4.8869	0.4729	24.4892	18.8686	0.4851	0.5032	.	.	0.5684	5.3803	0.7721	2.2073	.	0.3154	.	0.107	0.23	0.5287
QC-2		.	4.5761	.	0.7648	13.1912	4.6581	1.1945	14.592	34.4162	2.4805	0.2546	1.1129	6.1437	1.8375	1.3754	1.1805	0.1828	0.7176	2.2509	1.652	0.8988	0.8602	0.8917	1.7488	3.0189	2.1016	36.8154	5.1088	5.4221	0.5695	4.6076	0.598	24.274	19.4557	0.4177	0.6295	.	.	0.6382	5.3446	0.5629	2.1749	0.2778	0.3261	0.1084	0.1629	0.1938	0.5787
QC-3		.	5.0289	.	0.8829	13.9948	4.8874	1.1986	14.8138	33.3686	2.3664	0.2794	0.9896	5.9778	1.9779	1.3624	1.1919	0.2129	0.6014	2.102	1.5893	0.8553	0.8464	1.0591	1.5483	2.865	2.143	36.3372	5.107	5.4506	0.5435	5.1012	0.5455	24.3355	19.2634	0.5649	0.6082	.	.	0.5538	5.3666	0.7777	2.2747	.	.	.	0.1163	0.2067	0.5627
YS-05	1-1	.	3.0931	0.1727	0.4315	8.052	3.9386	0.7288	5.9239	44.2291	3.1823	0.2607	0.6997	6.4112	3.0652	2.8049	1.7701	0.2665	0.274	2.6896	1.6372	1.8358	1.5143	1.2714	1.1078	4.6396	2.7224	45.2613	3.5363	7.6527	.	2.1143	.	13.3969	24.5578	.	0.7583	.	.	0.5885	5.7595	0.6102	2.3864	.	.	.	.	.	0.6777
YS-13	1-2	.	2.8324	0.187	0.3692	8.5209	3.8869	0.7146	5.4289	44.8565	3.0384	0.1909	0.6646	6.2479	3.2601	2.68	1.6882	0.2485	0.3597	2.6897	1.5178	1.8202	1.5419	1.3124	1.2411	4.7022	3.3084	45.8256	3.8437	5.7655	.	2.1324	0.5912	12.2681	25.4226	.	0.8424	.	.	0.5544	5.4642	0.7578	2.5478	.	.	.	.	0.1326	0.5668
YS-15	1-3	.	3.0827	0.1909	0.4867	7.6999	4.2751	0.803	5.8354	44.0533	3.2127	0.2128	0.66	6.1123	3.4141	2.5993	1.6206	0.2802	0.3712	2.5216	1.5758	1.8909	1.6038	1.3198	1.122	5.0555	2.6199	45.5083	4.3423	7.4246	.	1.8493	0.6012	11.6218	25.0115	.	1.0211	.	.	0.4542	4.7577	0.751	2.6906	0.2652	.	.	.	.	0.5882
YS-06	2-1	0.1239	6.0067	0.2782	1.049	16.5248	5.4174	1.4725	20.0501	29.4742	2.2861	0.1738	1.3819	5.561	1.0818	0.6603	0.8692	0.1252	0.5942	1.4399	0.3454	0.3426	0.4988	0.6871	1.8384	1.7175	2.7446	43.9141	5.2776	2.1753	0.6531	7.3798	.	29.5413	8.3142	.	.	0.275	.	0.4075	3.5721	0.7875	1.7403	.	0.3464	.	0.0935	0.1446	0.2503
YS-11	2-2	.	5.6212	0.2487	0.8412	15.6386	5.1099	1.446	19.4805	29.226	2.1521	0.1713	1.6127	5.5384	0.9916	0.6762	0.7887	0.1224	0.7172	1.961	2.3477	0.3416	0.558	0.6341	1.9694	1.8055	2.0613	37.9319	6.3276	17.3186	.	5.9137	.	23.7053	6.7416	.	.	.	.	0.4448	3.2051	0.8726	2.0675	0.2374	0.6196	.	0.1408	0.3632	0.961
YS-04	2-3	.	6.3448	0.2893	0.9577	16.8032	5.2637	1.4544	21.1206	27.6828	2.3187	0.1614	1.3398	5.2991	1.1289	0.6255	0.8429	0.1463	0.759	1.4917	0.7563	0.3398	0.5066	0.6921	1.7957	1.8797	2.5136	40.6882	5.7821	7.249	0.7121	6.3945	0.4497	27.6714	8.0251	0.5143	.	.	0.2864	.	.	1.4583	3.1462	0.3262	.	.	0.1938	0.346	0.7733
[truncated: 845 more columns]

## Sheet: Lipid Class Concentration
Order	Study ID	CE	CER	DAG	DCER	FFA	HCER	LCER	LPC	LPE	PC	PE	SM	TAG
YS-00	Blank	.	0.0169	0.215	0.1938	186.105	.	.	0.0424	0.0302	0.0423	.	0.4645	0.6028
QC-1		101.644	30.2249	115.308	12.1756	1581.46	26.9996	40.5823	14.2211	4.1388	3345.6	1972.7	239.219	412.324
QC-2		101.665	28.3438	106.222	11.8663	1506.59	27.4894	38.1837	15.5555	4.6565	3425.5	1975.43	245.305	415.24
QC-3		101.396	29.8441	103.577	10.36	1512.7	29.8958	36.5049	15.9073	5.0386	3352.84	1932.71	246.141	413.353
Order	Study ID	CE	CER	DAG	DCER	FFA	HCER	LCER	LPC	LPE	PC	PE	SM	TAG
YS-05	1-1	136.568	16.169	77.8376	7.8918	1217.18	18.7681	39.3401	15.164	4.0114	2981.05	1686.91	254.082	244.149
YS-13	1-2	157.715	18.6809	106.411	7.5903	1412.49	20.4966	41.7384	16.1188	4.9253	3290.01	1988.92	281.261	283.2
YS-15	1-3	133.611	15.5247	94.7359	8.3206	1552.24	17.9066	43.2604	15.9047	4.4327	2798.19	1550.3	246.459	243.171
YS-06	2-1	230.626	27.0481	182.308	5.2277	1287.93	48.2154	29.7763	23.454	8.2268	4379.71	2685.8	254.206	155.612
YS-11	2-2	168.278	20.3234	140.266	19.3401	1821.27	35.515	21.6513	17.9664	5.2281	3366.38	1809.79	187.383	117.972
YS-04	2-3	266.538	29.8624	106.366	14.6165	1327.22	54.3992	33.61	21.5081	7.2612	4971.46	2749.17	271.26	178.275

## Sheet: Lipid Class Composition
Order	Study ID	CE	CER	DAG	DCER	FFA	HCER	LCER	LPC	LPE	PC	PE	SM	TAG
YS-00	Blank	.	0.009	0.1145	0.1032	99.1434	.	.	0.0226	0.0161	0.0225	.	0.2475	0.3211
QC-1		1.2872	0.3828	1.4602	0.1542	20.0272	0.3419	0.5139	0.1801	0.0524	42.3676	24.9816	3.0294	5.2215
QC-2		1.2866	0.3587	1.3442	0.1502	19.0658	0.3479	0.4832	0.1969	0.0589	43.3495	24.999	3.1043	5.2548
QC-3		1.3016	0.3831	1.3296	0.133	19.4179	0.3838	0.4686	0.2042	0.0647	43.0388	24.8093	3.1596	5.306
Order	Study ID	CE	CER	DAG	DCER	FFA	HCER	LCER	LPC	LPE	PC	PE	SM	TAG
YS-05	1-1	2.0386	0.2414	1.1619	0.1178	18.1693	0.2802	0.5872	0.2264	0.0599	44.499	25.1811	3.7928	3.6445
YS-13	1-2	2.0672	0.2448	1.3947	0.0995	18.5134	0.2686	0.5471	0.2113	0.0646	43.1219	26.0686	3.6865	3.7119
YS-15	1-3	1.9871	0.2309	1.4089	0.1237	23.0848	0.2663	0.6434	0.2365	0.0659	41.6146	23.0561	3.6653	3.6164
YS-06	2-1	2.475	0.2903	1.9565	0.0561	13.8218	0.5174	0.3196	0.2517	0.0883	47.0019	28.8234	2.7281	1.67
YS-11	2-2	2.1766	0.2629	1.8143	0.2502	23.5569	0.4594	0.28	0.2324	0.0676	43.5418	23.4084	2.4237	1.5259
YS-04	2-3	2.657	0.2977	1.0603	0.1457	13.2305	0.5423	0.335	0.2144	0.0724	49.5583	27.4053	2.7041	1.7771

## Sheet: Fatty Acid Concentration
Order	Study ID	CE(FA12:0)	CE(FA14:0)	CE(FA14:1)	CE(FA15:0)	CE(FA16:0)	CE(FA16:1)	CE(FA17:0)	CE(FA18:0)	CE(FA18:1)	CE(FA18:2)	CE(FA18:3)	CE(FA20:0)	CE(FA20:1)	CE(FA20:2)	CE(FA20:3)	CE(FA20:4)	CE(FA20:5)	CE(FA22:0)	CE(FA22:1)	CE(FA22:2)	CE(FA22:4)	CE(FA22:5)	CE(FA22:6)	CE(FA24:0)	CE(FA24:1)	CER(FA14:0)	CER(FA16:0)	CER(FA18:0)	CER(FA18:1)	CER(FA20:0)	CER(FA22:0)	CER(FA22:1)	CER(FA24:0)	CER(FA24:1)	CER(FA26:0)	CER(FA26:1)	DAG(FA12:0)	DAG(FA14:0)	DAG(FA14:1)	DAG(FA15:0)	DAG(FA16:0)	DAG(FA16:1)	DAG(FA18:0)	DAG(FA18:1)	DAG(FA18:2)	DAG(FA20:0)	DAG(FA20:1)	DAG(FA20:2)
YS-00	Blank	.	.	.	.	.	.	.	.	.	.	.	.	.	.	.	.	.	.	.	.	.	.	.	.	.	0.0169	.	.	.	.	.	.	.	.	.	.	.	.	.	.	0.27	.	0.16	.	.	.	.	.
QC-1		.	5.0184	0.2661	0.9146	13.2866	4.6928	1.1885	14.3172	36.096	2.4588	.	1.1467	5.9536	1.8718	1.4581	1.3523	0.1977	0.5014	2.0506	1.5258	0.8897	1.0311	1.0135	1.4345	2.9787	0.6451	11.2448	1.5101	1.653	0.1484	1.4771	0.1429	7.4018	5.703	0.1466	0.1521	.	11.4372	0.8749	0.5226	87.0137	14.7141	30.2542	69.0449	5.3528	3.2667	1.5032	0.895
QC-2		.	4.6523	.	0.7776	13.4109	4.7356	1.2144	14.8349	34.9893	2.5218	0.2589	1.1314	6.246	1.8681	1.3983	1.2001	0.1858	0.7295	2.2884	1.6795	0.9138	0.8745	0.9066	1.7779	3.0692	0.5957	10.4349	1.448	1.5368	0.1614	1.306	0.1695	6.8802	5.5145	0.1184	0.1784	.	10.8708	0.8206	0.4856	78.5039	13.6351	28.6958	61.5692	5.6214	3.3762	1.1986	1.0685
QC-3		.	5.0991	.	0.8953	14.1902	4.9556	1.2153	15.0206	33.8344	2.3994	0.2833	1.0034	6.0612	2.0055	1.3814	1.2085	0.2159	0.6098	2.1314	1.6115	0.8673	0.8582	1.0738	1.57	2.9049	0.6395	10.8445	1.5241	1.6267	0.1622	1.5224	0.1628	7.2627	5.749	0.1686	0.1815	.	9.9878	0.797	0.4646	76.6008	13.3308	28.8282	61.6098	4.1577	3.2663	1.3718	0.7036
Order	Study ID	CE(FA12:0)	CE(FA14:0)	CE(FA14:1)	CE(FA15:0)	CE(FA16:0)	CE(FA16:1)	CE(FA17:0)	CE(FA18:0)	CE(FA18:1)	CE(FA18:2)	CE(FA18:3)	CE(FA20:0)	CE(FA20:1)	CE(FA20:2)	CE(FA20:3)	CE(FA20:4)	CE(FA20:5)	CE(FA22:0)	CE(FA22:1)	CE(FA22:2)	CE(FA22:4)	CE(FA22:5)	CE(FA22:6)	CE(FA24:0)	CE(FA24:1)	CER(FA14:0)	CER(FA16:0)	CER(FA18:0)	CER(FA18:1)	CER(FA20:0)	CER(FA22:0)	CER(FA22:1)	CER(FA24:0)	CER(FA24:1)	CER(FA26:0)	CER(FA26:1)	DAG(FA12:0)	DAG(FA14:0)	DAG(FA14:1)	DAG(FA15:0)	DAG(FA16:0)	DAG(FA16:1)	DAG(FA18:0)	DAG(FA18:1)	DAG(FA18:2)	DAG(FA20:0)	DAG(FA20:1)	DAG(FA20:2)
YS-05	1-1	.	4.2242	0.2359	0.5892	10.9965	5.3789	0.9953	8.0901	60.4027	4.3461	0.3561	0.9555	8.7556	4.186	3.8305	2.4174	0.3639	0.3742	3.6731	2.2359	2.5071	2.0681	1.7363	1.5129	6.3362	0.4402	7.3183	0.5718	1.2374	.	0.3419	.	2.1661	3.9708	.	0.1226	.	7.7318	0.5275	0.3763	49.4361	9.9092	10.1194	60.0187	4.2488	2.5155	1.45	1.5748
YS-13	1-2	.	4.4671	0.2949	0.5823	13.4387	6.1303	1.1271	8.5622	70.7453	4.7921	0.301	1.0482	9.8539	5.1417	4.2267	2.6625	0.392	0.5673	4.2421	2.3938	2.8708	2.4319	2.0699	1.9574	7.416	0.618	8.5607	0.718	1.077	.	0.3984	0.1104	2.2918	4.7492	.	0.1574	.	10.5118	0.7443	0.4762	68.5766	14.2435	15.6445	83.6902	4.0028	3.9363	2.1397	1.6861
YS-15	1-3	.	4.1189	0.2551	0.6503	10.288	5.712	1.0729	7.7968	58.8603	4.2926	0.2843	0.8818	8.1668	4.5616	3.473	2.1653	0.3744	0.496	3.3692	2.1055	2.5264	2.1429	1.7634	1.4991	6.7548	0.4067	7.065	0.6741	1.1526	.	0.2871	0.0933	1.8043	3.883	.	0.1585	.	8.8795	0.5572	0.4745	57.8063	13.0182	13.4731	74.6624	5.648	2.9792	1.8759	1.9104
YS-06	2-1	0.2858	13.8529	0.6416	2.4193	38.1105	12.494	3.3959	46.2406	67.9751	5.2724	0.4009	3.1869	12.8252	2.4949	1.5227	2.0045	0.2889	1.3704	3.3208	0.7966	0.7902	1.1503	1.5846	4.2399	3.9609	0.7424	11.8779	1.4275	0.5884	0.1767	1.9961	.	7.9903	2.2488	.	.	0.5013	13.4084	0.7199	0.4228	146.675	23.5762	79.6819	74.521	7.8565	8.3621	1.7186	0.7175
YS-11	2-2	.	9.4593	0.4186	1.4156	26.3164	8.5989	2.4333	32.7814	49.181	3.6215	0.2883	2.7138	9.3199	1.6686	1.1379	1.3272	0.2059	1.2069	3.2999	3.9507	0.5748	0.9389	1.0671	3.314	3.0382	0.4189	7.709	1.286	3.5197	.	1.2019	.	4.8177	1.3701	.	.	.	11.267	1.8575	1.044	105.334	21.636	54.4345	66.3917	5.3885	6.5269	1.5	0.5293
YS-04	2-3	.	16.9114	0.771	2.5527	44.787	14.0298	3.8765	56.2943	73.7851	6.1802	0.4303	3.571	14.1241	3.0089	1.6673	2.2466	0.3901	2.0231	3.9758	2.0158	0.9057	1.3504	1.8447	4.7862	5.0101	0.7506	12.1505	1.7267	2.1647	0.2126	1.9095	0.1343	8.2633	2.3965	0.1536	.	0.3046	5.4507	1.1906	0.7549	47.5051	25.802	23.61	88.3195	9.4082	.	2.0958	1.1424
[truncated: 154 more columns]

## Sheet: Fatty Acid Composition
Order	Study ID	CE(FA12:0)	CE(FA14:0)	CE(FA14:1)	CE(FA15:0)	CE(FA16:0)	CE(FA16:1)	CE(FA17:0)	CE(FA18:0)	CE(FA18:1)	CE(FA18:2)	CE(FA18:3)	CE(FA20:0)	CE(FA20:1)	CE(FA20:2)	CE(FA20:3)	CE(FA20:4)	CE(FA20:5)	CE(FA22:0)	CE(FA22:1)	CE(FA22:2)	CE(FA22:4)	CE(FA22:5)	CE(FA22:6)	CE(FA24:0)	CE(FA24:1)	CER(FA14:0)	CER(FA16:0)	CER(FA18:0)	CER(FA18:1)	CER(FA20:0)	CER(FA22:0)	CER(FA22:1)	CER(FA24:0)	CER(FA24:1)	CER(FA26:0)	CER(FA26:1)	DAG(FA12:0)	DAG(FA14:0)	DAG(FA14:1)	DAG(FA15:0)	DAG(FA16:0)	DAG(FA16:1)	DAG(FA18:0)	DAG(FA18:1)	DAG(FA18:2)	DAG(FA20:0)	DAG(FA20:1)	DAG(FA20:2)
YS-00	Blank	.	.	.	.	.	.	.	.	.	.	.	.	.	.	.	.	.	.	.	.	.	.	.	.	.	100	.	.	.	.	.	.	.	.	.	.	.	.	.	.	62.7928	.	37.2072	.	.	.	.	.
QC-1		.	4.9373	0.2618	0.8998	13.0716	4.6169	1.1692	14.0856	35.5121	2.4191	.	1.1281	5.8573	1.8415	1.4345	1.3304	0.1945	0.4933	2.0174	1.5011	0.8753	1.0144	0.9971	1.4113	2.9305	2.1342	37.2037	4.9961	5.469	0.4911	4.8869	0.4729	24.4892	18.8686	0.4851	0.5032	.	4.9594	0.3794	0.2266	37.7311	6.3804	13.1189	29.9394	2.3211	1.4165	0.6518	0.3881
QC-2		.	4.5761	.	0.7648	13.1912	4.6581	1.1945	14.592	34.4162	2.4805	0.2546	1.1129	6.1437	1.8375	1.3754	1.1805	0.1828	0.7176	2.2509	1.652	0.8988	0.8602	0.8917	1.7488	3.0189	2.1016	36.8154	5.1088	5.4221	0.5695	4.6076	0.598	24.274	19.4557	0.4177	0.6295	.	5.117	0.3863	0.2286	36.9526	6.4182	13.5074	28.9813	2.6461	1.5892	0.5642	0.503
QC-3		.	5.0289	.	0.8829	13.9948	4.8874	1.1986	14.8138	33.3686	2.3664	0.2794	0.9896	5.9778	1.9779	1.3624	1.1919	0.2129	0.6014	2.102	1.5893	0.8553	0.8464	1.0591	1.5483	2.865	2.143	36.3372	5.107	5.4506	0.5435	5.1012	0.5455	24.3355	19.2634	0.5649	0.6082	.	4.8214	0.3847	0.2243	36.9778	6.4352	13.9164	29.7412	2.007	1.5767	0.6622	0.3397
Order	Study ID	CE(FA12:0)	CE(FA14:0)	CE(FA14:1)	CE(FA15:0)	CE(FA16:0)	CE(FA16:1)	CE(FA17:0)	CE(FA18:0)	CE(FA18:1)	CE(FA18:2)	CE(FA18:3)	CE(FA20:0)	CE(FA20:1)	CE(FA20:2)	CE(FA20:3)	CE(FA20:4)	CE(FA20:5)	CE(FA22:0)	CE(FA22:1)	CE(FA22:2)	CE(FA22:4)	CE(FA22:5)	CE(FA22:6)	CE(FA24:0)	CE(FA24:1)	CER(FA14:0)	CER(FA16:0)	CER(FA18:0)	CER(FA18:1)	CER(FA20:0)	CER(FA22:0)	CER(FA22:1)	CER(FA24:0)	CER(FA24:1)	CER(FA26:0)	CER(FA26:1)	DAG(FA12:0)	DAG(FA14:0)	DAG(FA14:1)	DAG(FA15:0)	DAG(FA16:0)	DAG(FA16:1)	DAG(FA18:0)	DAG(FA18:1)	DAG(FA18:2)	DAG(FA20:0)	DAG(FA20:1)	DAG(FA20:2)
YS-05	1-1	.	3.0931	0.1727	0.4315	8.052	3.9386	0.7288	5.9239	44.2291	3.1823	0.2607	0.6997	6.4112	3.0652	2.8049	1.7701	0.2665	0.274	2.6896	1.6372	1.8358	1.5143	1.2714	1.1078	4.6396	2.7224	45.2613	3.5363	7.6527	.	2.1143	.	13.3969	24.5578	.	0.7583	.	4.9666	0.3388	0.2417	31.7559	6.3653	6.5003	38.5538	2.7293	1.6159	0.9314	1.0116
YS-13	1-2	.	2.8324	0.187	0.3692	8.5209	3.8869	0.7146	5.4289	44.8565	3.0384	0.1909	0.6646	6.2479	3.2601	2.68	1.6882	0.2485	0.3597	2.6897	1.5178	1.8202	1.5419	1.3124	1.2411	4.7022	3.3084	45.8256	3.8437	5.7655	.	2.1324	0.5912	12.2681	25.4226	.	0.8424	.	4.9392	0.3497	0.2237	32.2224	6.6927	7.3509	39.3239	1.8808	1.8496	1.0054	0.7923
YS-15	1-3	.	3.0827	0.1909	0.4867	7.6999	4.2751	0.803	5.8354	44.0533	3.2127	0.2128	0.66	6.1123	3.4141	2.5993	1.6206	0.2802	0.3712	2.5216	1.5758	1.8909	1.6038	1.3198	1.122	5.0555	2.6199	45.5083	4.3423	7.4246	.	1.8493	0.6012	11.6218	25.0115	.	1.0211	.	4.6864	0.2941	0.2504	30.5092	6.8708	7.1109	39.4055	2.9809	1.5724	0.99	1.0083
YS-06	2-1	0.1239	6.0067	0.2782	1.049	16.5248	5.4174	1.4725	20.0501	29.4742	2.2861	0.1738	1.3819	5.561	1.0818	0.6603	0.8692	0.1252	0.5942	1.4399	0.3454	0.3426	0.4988	0.6871	1.8384	1.7175	2.7446	43.9141	5.2776	2.1753	0.6531	7.3798	.	29.5413	8.3142	.	.	0.1375	3.6774	0.1974	0.116	40.2272	6.4661	21.8537	20.4382	2.1547	2.2934	0.4714	0.1968
YS-11	2-2	.	5.6212	0.2487	0.8412	15.6386	5.1099	1.446	19.4805	29.226	2.1521	0.1713	1.6127	5.5384	0.9916	0.6762	0.7887	0.1224	0.7172	1.961	2.3477	0.3416	0.558	0.6341	1.9694	1.8055	2.0613	37.9319	6.3276	17.3186	.	5.9137	.	23.7053	6.7416	.	.	.	4.0163	0.6621	0.3721	37.5478	7.7125	19.404	23.6663	1.9208	2.3266	0.5347	0.1887
YS-04	2-3	.	6.3448	0.2893	0.9577	16.8032	5.2637	1.4544	21.1206	27.6828	2.3187	0.1614	1.3398	5.2991	1.1289	0.6255	0.8429	0.1463	0.759	1.4917	0.7563	0.3398	0.5066	0.6921	1.7957	1.8797	2.5136	40.6882	5.7821	7.249	0.7121	6.3945	0.4497	27.6714	8.0251	0.5143	.	0.1432	2.5622	0.5597	0.3549	22.3309	12.1289	11.0985	41.5167	4.4225	.	0.9852	0.537
[truncated: 154 more columns]
